# Supplementary material
Source: ML conference proceedings conference paper supplement (https://proceedings.neurips.cc/paper_files/paper/2010/hash/81dc9bdb52d04dc20036dbd8313ed055-Abstract.html)
Supplement: Supplementary file 1 [file 81dc9bdb52d04dc20036dbd8313ed055-Supplemental.zip]

Archive with 1 entries (1 files):
- extra/NIPS2010_1234_extra.pdf
